# Supplementary material for: MRI contrast enhancement of liver pre-neoplasia using iron–tannic nanoparticles
Source: Royal Society of Chemistry journal article supplement (doi:10.1039/d0ra07308c), 2020-01-01
Supplement: d0ra07308c1.pdf [file d0ra07308c1.pdf]

## Electronic Supplementary Information (ESI)

### **MRI Contrast Enhancement of Liver Pre-neoplasia Using Iron-Tannic Nanoparticles**

Thipjutha Phatruengdet, Janarong Intakhat, Monreudee Tapunya, Arpamas Chariyakornkul, Chi Be Hlaing, Rawiwan Wongpoomchai and Chalermchai Pilapong\*

#### **Calculation of concentration of the Fe-TA NPs**

Fe-TA NPs were firstly lysed with a mixed acid solution (1:1 of HCl:HNO<sub>3</sub>) for 30 min at 60 °C. After that, the free ferric ions were then reacted with thiocyanate salt to form the iron-thiocyanate complexes ([Fe(SCN)<sub>6</sub>]<sup>3-</sup>(aq)). Then, the iron concentration is determined by spectrophotometric measurements at 478 nm ( $\epsilon_{478}=4584 \text{ M}^{-1}\text{cm}^{-1}$ ) using an Agilent 8453 UV-visible spectrophotometer. The obtained equivalent concentration of iron was used to estimate the concentration of Fe-TA NPs according to empirical stoichiometry of Fe<sub>3</sub>TA (Based on Job's plot, the optimal structure chelation of Fe-TA NPs was about 3:1 mole ratio of Fe to TA).

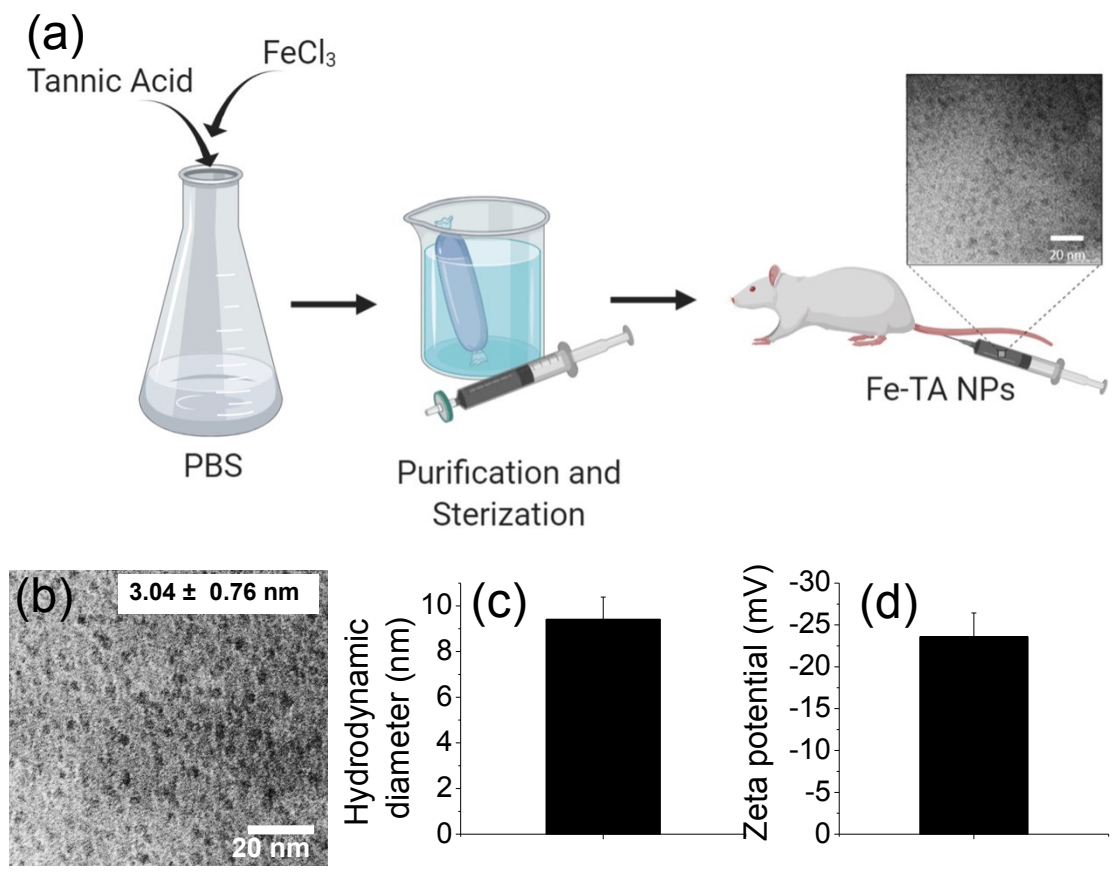

**Figure S1.** (a) Illustration of key steps for Fe-TA NPs preparation. (b) TEM image of Fe-TA NPs with their physical size. (c,d) Hydrodynamic diameter (HD) and zeta potential of Fe-TA NPs, measured after being incubated in PBS for 1 h.

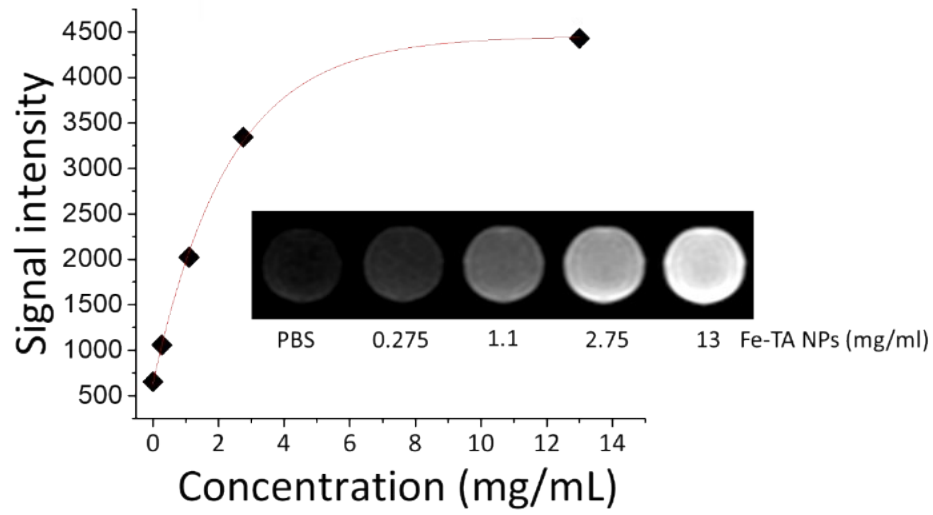

**Figure S2.** Signal intensity with the corresponding MRI image of different concentrations of Fe-TA NPs dispersed in PBS. Signal intensity was directly measured from the  $T_1$ -weighted MR image using Phillips DICOM viewer software.

**Table S1.** Body weight, organ weight and hematological values of rats in acute toxicity tests WBC: White blood cell, RBC: Red blood cell, PLT: Platelet, N.D.: Not determined, \* p<0.05 compared to control. All data have shown in Mean  $\pm$  SD

| Parameters                | PBS                                    | Fe-TA NPs (mg/kg b.w.) |                  |                 |                 |
|---------------------------|----------------------------------------|------------------------|------------------|-----------------|-----------------|
|                           |                                        | 17.5                   | 27.5             | 55              |                 |
| Started weight (g.)       | 183 $\pm$ 10                           | 197 $\pm$ 6            | 195 $\pm$ 5      | 186 $\pm$ 11    |                 |
| End weight (g.)           | 196 $\pm$ 18                           | 205 $\pm$ 13           | 215 $\pm$ 9      | 200 $\pm$ 14    |                 |
| Organ weight (g)          | Liver                                  | 7.28 $\pm$ 0.59        | 8.22 $\pm$ 0.74  | 7.83 $\pm$ 0.61 | 7.11 $\pm$ 0.41 |
|                           | Spleen                                 | 0.44 $\pm$ 0.06        | 0.50 $\pm$ 0.06  | 0.50 $\pm$ 0.06 | 0.46 $\pm$ 0.08 |
|                           | kidney                                 | 1.42 $\pm$ 0.11        | 1.72 $\pm$ 0.10* | 1.53 $\pm$ 0.03 | 1.44 $\pm$ 0.16 |
| Relative organ weight (%) | Liver                                  | 3.71 $\pm$ 0.04        | 4.01 $\pm$ 0.13  | 3.65 $\pm$ 0.31 | 3.56 $\pm$ 1.17 |
|                           | Spleen                                 | 0.22 $\pm$ 0.01        | 0.24 $\pm$ 0.03  | 0.23 $\pm$ 0.03 | 0.23 $\pm$ 0.04 |
|                           | kidney                                 | 0.72 $\pm$ 0.01        | 0.84 $\pm$ 0.02* | 0.71 $\pm$ 0.02 | 0.72 $\pm$ 0.04 |
| Blood test                | WBC<br>( $\times 10^3 / \mu\text{L}$ ) | 3.23 $\pm$ 0.75        | N.D.             | 3.45 $\pm$ 0.25 | 3.60 $\pm$ 1.17 |
|                           | RBC<br>( $\times 10^6 / \mu\text{L}$ ) | 7.24 $\pm$ 0.13        | N.D.             | 7.36 $\pm$ 0.57 | 7.42 $\pm$ 0.72 |
|                           | PLT ( $\times 10^3 / \mu\text{L}$ )    | 805 $\pm$ 91           | N.D.             | 892 $\pm$ 111   | 688 $\pm$ 195   |
